# Supplementary material for: Inorganic fertilizer use and its association with rice yield gaps in sub-Saharan Africa
Source: PubMed Central journal article supplement (PMC10518462; doi:10.1016/j.gfs.2023.100708), 2023-09
Supplement: mmc1.pdf [file mmc1.pdf]

## Supplementary material

### Global Food Security

#### **Inorganic fertilizer use and its association with rice yield gaps in sub-Saharan Africa**

Jean-Martial Johnson<sup>1,2\*</sup>, Ali Ibrahim<sup>3</sup>, Elliott Ronald Dossou-Yovo<sup>1</sup>, Kalimuthu Senthilkumar<sup>4</sup>, Yasuhiro Tsujimoto<sup>5</sup>, Hidetoshi Asai<sup>5</sup>, Kazuki Saito<sup>1</sup>

<sup>1</sup> Africa Rice Center (AfricaRice), 01 B.P. 2551, Bouaké 01, Côte d'Ivoire

<sup>2</sup> Institute of Crop Science and Resource Conservation (INRES), University of Bonn, D-53115 Bonn, Germany

<sup>3</sup> Africa Rice Center (AfricaRice), PMB 82, 901101, Abuja, Nigeria

<sup>4</sup> Africa Rice Center (AfricaRice), B.P. 1690, Antananarivo 101, Madagascar

<sup>5</sup> Japan International Research Center for Agricultural Sciences (JIRCAS), 1-1 Ohwashi, Tsukuba, Ibaraki 3058686, Japan

\* Corresponding author: Jean-Martial Johnson, E-mail address: [j.johnson@uni-bonn.de](mailto:j.johnson@uni-bonn.de); <https://orcid.org/0000-0002-2638-8774>

**Table S1**

Mean grain yield and fertilizer application rates across various countries and rice production systems in sub-Saharan Africa.

| Country       | Growing environment | Grain yield (Mg/ha) |      |      |        | N application rate (kg N/ha) |      |    |        | P application rate (kg P/ha) |      |    |        | K application rate (kg K/ha) |      |    |        |
|---------------|---------------------|---------------------|------|------|--------|------------------------------|------|----|--------|------------------------------|------|----|--------|------------------------------|------|----|--------|
|               |                     | n                   | Mean | SD   | Median | n                            | Mean | SD | Median | n                            | Mean | SD | Median | n                            | Mean | SD | Median |
| Benin         | IL                  | 9                   | 4.57 | 0.94 | 3.20   | 9                            | 92   | 17 | 67     | 9                            | 16   | 4  | 10     | 9                            | 29   | 8  | 18     |
| Benin         | RL                  | 4                   | 1.80 | 0.71 | 0.98   | 4                            | 41   | 38 | 7      | 4                            | 6    | 5  | 3      | 4                            | 11   | 9  | 5      |
| Burkina Faso  | IL                  | 8                   | 5.37 | 0.65 | 4.38   | 8                            | 95   | 20 | 77     | 8                            | 19   | 3  | 15     | 8                            | 20   | 0  | 20     |
| Burkina Faso  | RL                  | 2                   | 2.64 | 0.15 | 2.54   | 2                            | 46   | 50 | 14     | 2                            | 12   | 8  | 7      | 2                            | 7    |    | 7      |
| Cameroon      | IL                  | 2                   | 2.85 | 0.46 | 2.55   | 2                            | 29   | 31 | 9      | 2                            | 6    | 7  | 2      | 2                            | 9    | 8  | 4      |
| Cameroon      | RL                  | 5                   | 3.83 | 1.66 | 1.75   | 5                            | 43   | 70 | 0      | 5                            | 2    | 2  | 0      | 5                            | 4    | 5  | 0      |
| Côte d'Ivoire | IL                  | 10                  | 3.93 | 1.20 | 2.24   | 10                           | 63   | 37 | 11     | 10                           | 20   | 16 | 5      | 10                           | 27   | 14 | 8      |
| Côte d'Ivoire | RL                  | 2                   | 2.41 | 1.48 | 1.47   | 2                            | 23   | 11 | 16     | 2                            | 3    | 2  | 2      | 2                            | 5    | 3  | 3      |
| Côte d'Ivoire | RU                  | 3                   | 1.74 | 0.79 | 1.16   | 3                            | 0    | 0  | 0      | 3                            | 0    | 0  | 0      | 3                            | 0    | 0  | 0      |
| Ghana         | IL                  | 8                   | 4.51 | 0.78 | 3.54   | 8                            | 95   | 45 | 34     | 8                            | 17   | 9  | 5      | 8                            | 21   | 12 | 7      |
| Ghana         | RL                  | 9                   | 2.29 | 2.07 | 0.86   | 9                            | 49   | 45 | 6      | 9                            | 9    | 10 | 1      | 9                            | 10   | 10 | 2      |
| Ghana         | RU                  | 3                   | 1.96 | 0.53 | 1.50   | 3                            | 33   | 21 | 16     | 3                            | 4    | 2  | 3      | 3                            | 5    |    | 5      |
| Guinea        | RU                  | 2                   | 1.54 | 0.18 | 1.42   | 2                            | 8    | 5  | 4      | 2                            | 2    | 0  | 2      | 2                            | 4    | 0  | 3      |
| Kenya         | IL                  | 3                   | 5.02 | 0.30 | 4.75   | 3                            | 53   | 16 | 40     | 3                            | 25   | 2  | 24     | 3                            | 3    |    | 3      |
| Madagascar    | RL                  | 2                   | 3.61 | 0.47 | 3.31   | 2                            | 0    | 0  | 0      | 2                            | 0    |    | 0      | 2                            | 0    |    | 0      |
| Madagascar    | RU                  | 3                   | 2.15 | 0.53 | 1.82   | 3                            | 5    | 7  | 0      | 3                            | 0    | 0  | 0      | 3                            | 0    | 0  | 0      |
| Malawi        | RL                  | 2                   | 1.70 | 0.55 | 1.35   | 2                            | 11   |    | 11     | 2                            | 2    |    | 2      | 2                            | 0    |    | 0      |
| Malawi        | RU                  | 2                   | 1.14 | 0.57 | 0.78   | 2                            | 18   |    | 18     | 2                            | 4    |    | 4      | 2                            | 0    |    | 0      |
| Mali          | IL                  | 6                   | 4.82 | 1.15 | 3.12   | 6                            | 86   | 43 | 28     | 6                            | 15   | 9  | 4      | 6                            | 3    | 2  | 1      |
| Mali          | RL                  | 3                   | 1.95 | 0.59 | 1.45   | 3                            | 55   | 28 | 30     | 3                            | 6    | 4  | 3      | 3                            | 7    | 4  | 4      |
| Mali          | RU                  | 2                   | 1.28 | 0.81 | 0.77   | 2                            | 66   | 32 | 46     | 2                            | 12   | 4  | 9      | 2                            | 8    | 12 | 1      |
| Niger         | IL                  | 4                   | 4.79 | 1.40 | 3.12   | 4                            | 113  | 41 | 85     | 4                            | 15   | 7  | 7      | 4                            | 25   | 13 | 13     |
| Nigeria       | IL                  | 4                   | 4.53 | 0.52 | 3.94   | 4                            | 50   | 52 | 4      | 4                            | 9    | 8  | 1      | 4                            | 0    |    | 0      |
| Nigeria       | RL                  | 8                   | 2.24 | 0.81 | 1.23   | 8                            | 40   | 34 | 2      | 8                            | 6    | 6  | 0      | 8                            | 0    | 0  | 0      |
| Nigeria       | RU                  | 2                   | 1.67 | 0.23 | 1.53   | 2                            | 33   | 26 | 17     | 2                            | 9    |    | 9      | 2                            |      |    |        |

|              |    |    |      |      |      |    |     |    |    |    |    |    |   |    |    |    |   |
|--------------|----|----|------|------|------|----|-----|----|----|----|----|----|---|----|----|----|---|
| Senegal      | IL | 17 | 5.30 | 1.02 | 3.54 | 17 | 144 | 52 | 78 | 17 | 25 | 16 | 8 | 17 | 1  | 2  | 0 |
| Sierra Leone | RL | 4  | 1.66 | 0.88 | 0.89 | 4  | 8   | 13 | 0  | 4  | 1  | 2  | 0 | 4  | 3  | 3  | 0 |
| Tanzania     | IL | 5  | 4.07 | 1.74 | 2.40 | 5  | 56  | 41 | 10 | 5  | 12 | 8  | 3 | 5  | 0  |    | 0 |
| Tanzania     | RL | 6  | 3.38 | 1.46 | 2.07 | 6  | 38  | 35 | 5  | 6  | 3  | 3  | 0 | 6  | 0  | 0  | 0 |
| The Gambia   | IL | 2  | 3.67 | 0.11 | 3.60 | 2  | 44  | 35 | 22 | 2  | 7  | 5  | 4 | 2  | 13 | 9  | 7 |
| The Gambia   | RU | 2  | 1.32 | 0.30 | 1.12 | 2  | 13  | 4  | 10 | 2  | 4  | 1  | 3 | 2  | 7  | 3  | 6 |
| Togo         | IL | 3  | 3.65 | 0.99 | 2.67 | 3  | 23  | 20 | 3  | 3  | 6  | 6  | 0 | 3  | 10 | 12 | 1 |
| Togo         | RL | 3  | 2.58 | 0.61 | 2.02 | 3  | 56  | 73 | 3  | 3  | 9  | 8  | 1 | 3  | 16 | 14 | 2 |
| Uganda       | IL | 2  | 3.03 | 0.11 | 2.96 | 2  | 1   | 1  | 0  | 2  | 0  |    | 0 | 2  | 0  |    | 0 |

n - Number of data points

SD - Standard error

IL – Irrigated lowland

RL – Rainfed lowland

RU – Rainfed upland

**Table S2**

Comparison of N, P, K application rates, partial factor productivity of N, P, and K and grain yield, and relative yield gap in rice fields between coastal and landlocked countries in sub-Saharan Africa.

|                                                | Coastal country   | Landlocked country | Test statistic    |
|------------------------------------------------|-------------------|--------------------|-------------------|
| N application rate (kg N/ha)                   |                   |                    | 0.475             |
| Mean (SD)                                      | 48.95 (50.72)     | 50.15 (44.07)      | Wilcoxon rank-sum |
| Median (IQR)                                   | 30.00 (71.10)     | 44.55 (69.62)      |                   |
| P application rate (kg P/ha)                   |                   |                    | 0.369             |
| Mean (SD)                                      | 9.26 (11.01)      | 9.24 (8.56)        | Wilcoxon rank-sum |
| Median (IQR)                                   | 5.20 (12.50)      | 6.30 (15.57)       |                   |
| K application rate (kg K/ha)                   |                   |                    | 0.105             |
| Mean (SD)                                      | 8.31 (11.66)      | 8.68 (9.34)        | Wilcoxon rank-sum |
| Median (IQR)                                   | 3.05 (11.15)      | 4.30 (15.60)       |                   |
| Grain yield (Mg grain/ha)                      |                   |                    | 0.008             |
| Mean (SD)                                      | 3.14 (1.64)       | 2.60 (1.70)        | Wilcoxon rank-sum |
| Median (IQR)                                   | 2.76 (2.60)       | 1.95 (2.05)        |                   |
| PFPN (kg grain/kg N)                           |                   |                    | 0.015             |
| Mean (SD)                                      | 195.46 (343.18)   | 177.83 (374.53)    | Wilcoxon rank-sum |
| Median (IQR)                                   | 71.00 (144.50)    | 53.00 (85.00)      |                   |
| PFPP (kg grain/kg P)                           |                   |                    | 0.014             |
| Mean (SD)                                      | 1774.28 (8528.12) | 483.34 (619.90)    | Wilcoxon rank-sum |
| Median (IQR)                                   | 367.50 (827.50)   | 281.00 (284.25)    |                   |
| PFPK (kg grain/kg K)                           |                   |                    | 0.018             |
| Mean (SD)                                      | 940.00 (2198.31)  | 359.70 (383.41)    | Wilcoxon rank-sum |
| Median (IQR)                                   | 306.00 (642.00)   | 171.50 (380.25)    |                   |
| Potential yield or water-limited yield (Mg/ha) |                   |                    | 0.025             |
| Mean (SD)                                      | 7.85 (1.64)       | 8.66 (1.62)        | Wilcoxon rank-sum |
| Median (IQR)                                   | 7.60 (2.00)       | 8.70 (1.00)        |                   |
| Relative yield gap (%)                         |                   |                    | 0.344             |
| Mean (SD)                                      | 57.03 (22.30)     | 53.77 (18.29)      | Wilcoxon rank-sum |
| Median (IQR)                                   | 61.40 (31.60)     | 46.90 (28.60)      |                   |

SD - Standard deviation

IQR - Interquartile range

**Table S3**

N, P, K application rates, partial factor productivity of N, P and K, grain yield, and relative yield gap in rice fields, across various regions in sub-Saharan Africa.

|                              | WA              | CA              | ESA              | Overall          | Test statistic |
|------------------------------|-----------------|-----------------|------------------|------------------|----------------|
| N application rate (kg N/ha) |                 |                 |                  |                  | <0.001         |
| Mean (SD)                    | 57.91 (50.21)   | 30.77 (53.74)   | 24.73 (31.51)    | 49.31 (48.74)    | Kruskal-Wallis |
| Median (IQR)                 | 52.10 (73.83)   | 7.20 (43.00)    | 10.00 (39.80)    | 30.30 (72.00)    |                |
| Group                        | a               | b               | b                |                  |                |
| P application rate (kg P/ha) |                 |                 |                  |                  | <0.001         |
| Mean (SD)                    | 10.77 (10.77)   | 2.63 (3.69)     | 5.16 (7.37)      | 9.25 (10.27)     | Kruskal-Wallis |
| Median (IQR)                 | 9.00 (14.40)    | 1.60 (4.00)     | 1.60 (7.20)      | 5.35 (13.33)     |                |
| Group                        | a               | b               | b                |                  |                |
| K application rate (kg K/ha) |                 |                 |                  |                  | <0.001         |
| Mean (SD)                    | 10.66 (11.58)   | 4.22 (5.20)     | 1.19 (3.75)      | 8.43 (10.93)     | Kruskal-Wallis |
| Median (IQR)                 | 5.30 (16.88)    | 3.00 ( 7.60)    | 0.00 ( 1.03)     | 3.60 (16.00)     |                |
| Group                        | a               | ab              | b                |                  |                |
| PFPN (kg grain/ha/kg N)      |                 |                 |                  |                  | <0.001         |
| Mean (SD)                    | 134.33 (245.56) | 401.67 (649.17) | 365.76 (535.13)  | 189.84 (352.64)  | Kruskal-Wallis |
| Median (IQR)                 | 54.00 ( 86.00)  | 128.00 (227.00) | 157.00 (229.25)  | 63.00 (133.50)   |                |
| Group                        | b               | ab              | a                |                  |                |
| PFPP (kg grain/kg P)         |                 |                 |                  |                  | 0.005          |
| Mean (SD)                    | 1374 (7748)     | 995 (476)       | 1157 (1248)      | 1325 (6911)      | Kruskal-Wallis |
| Median (IQR)                 | 299 (345)       | 1062 (251)      | 609 (1358)       | 325 (635)        |                |
| Group                        | a               | ab              | b                |                  |                |
| PFPK (kg grain/kg K)         |                 |                 |                  |                  | 0.001          |
| Mean (SD)                    | 666 (1830)      | 536.60 (223.77) | 1154.64 (869.92) | 704.11 (1730.02) | Kruskal-Wallis |
| Median (IQR)                 | 203 ( 395)      | 558 (141)       | 783 (1077)       | 249 (552)        |                |
| Group                        | a               | ab              | a                |                  |                |

|                                                |               |               |               |               |                |
|------------------------------------------------|---------------|---------------|---------------|---------------|----------------|
| Grain yield (Mg grain/ha)                      |               |               |               |               | 0.638          |
| Mean (SD)                                      | 3.03 (1.70)   | 3.15 (1.53)   | 2.80 (1.65)   | 2.98 (1.68)   | Kruskal-Wallis |
| Median (IQR)                                   | 2.55 (2.98)   | 2.85 (2.03)   | 2.30 (1.99)   | 2.55 (2.77)   |                |
| Group                                          | a             | a             | a             |               |                |
| Potential yield or water-limited yield (Mg/ha) |               |               |               |               | 0.163          |
| Mean (SD)                                      | 7.87 (1.33)   | 8.44 (1.26)   | 9.56 (2.92)   | 8.10 (1.67)   | Kruskal-Wallis |
| Median (IQR)                                   | 8.10 (1.95)   | 8.90 (0.20)   | 9.80 (4.52)   | 8.15 (2.20)   |                |
| Group                                          | a             | a             | a             |               |                |
| Relative yield gap (%)                         |               |               |               |               | 0.727          |
| Mean (SD)                                      | 55.36 (21.82) | 56.42 (13.31) | 60.43 (19.22) | 56.02 (21.10) | Kruskal-Wallis |
| Median (IQR)                                   | 56.50 (35.30) | 58.70 (14.40) | 66.25 (13.28) | 60.05 (32.25) |                |
| Group                                          | a             | a             | a             |               |                |

---

WA - West Africa

CA - Central Africa

ESA - East and Southern Africa

**Table S4**

N, P, K application rates, partial factor productivity of N, P, and K and grain yield in rice fields, and relative yield gap across various growing environments [irrigated lowland (IL), rainfed lowland (RL), and, rainfed upland (RU)] in sub-Saharan Africa.

|                              | IL                 | RL                | RU              | Test statistic |
|------------------------------|--------------------|-------------------|-----------------|----------------|
| N application rate (kg N/ha) |                    |                   |                 | <0.001         |
| Mean (SD)                    | 84.17 (70.32)      | 38.46 (43.05)     | 23.25 (28.41)   | Kruskal-Wallis |
| Median (IQR)                 | 86.90 (62.50)      | 25.30 (58.20)     | 12.60 (34.25)   |                |
| Group                        | a                  | b                 | b               |                |
| P application rate (kg P/ha) |                    |                   |                 | <0.001         |
| Mean (SD)                    | 16.78 (11.54)      | 5.56 (6.43)       | 4.16 (4.38)     | Kruskal-Wallis |
| Median (IQR)                 | 15.95 (10.70)      | 3.50 (9.55)       | 2.90 (6.35)     |                |
| Group                        | a                  | b                 | b               |                |
| K application rate (kg K/ha) |                    |                   |                 | 0.004          |
| Mean (SD)                    | 14.87 (13.92)      | 6.52 (8.86)       | 4.37 (6.45)     | Kruskal-Wallis |
| Median (IQR)                 | 14.00 (22.95)      | 4.10 (7.18)       | 0.00 (5.50)     |                |
| Group                        | a                  | b                 | b               |                |
| PFPN (kg grain/kg N)         |                    |                   |                 | 0.57           |
| Mean (SD)                    | 122.45 (259.57)    | 257.71 (515.29)   | 205.50 (325.22) | Kruskal-Wallis |
| Median (IQR)                 | 54.00 (33.00)      | 74.00 (114.00)    | 98.00 (168.50)  |                |
| Group                        | a                  | a                 | a               |                |
| PFPP (kg grain/kg P)         |                    |                   |                 | 0.419          |
| Mean (SD)                    | 1797.39 (11113.39) | 1173.03 (2129.31) | 444.00 (367.15) | Kruskal-Wallis |
| Median (IQR)                 | 299.00 (155.50)    | 444.00 (671.00)   | 236.00 (448.50) |                |
| Group                        | a                  | a                 | a               |                |
| PFPK (kg grain/kg K)         |                    |                   |                 | 0.708          |
| Mean (SD)                    | 826.45 (2679.79)   | 674.84 (1229.89)  | 269.75 (183.35) | Kruskal-Wallis |
| Median (IQR)                 | 225.50 (442.50)    | 327.00 (323.00)   | 270.00 (292.25) |                |

|                                                |               |               |               |                |
|------------------------------------------------|---------------|---------------|---------------|----------------|
| Group                                          | a             | a             | a             |                |
| Grain yield (Mg grain/ha)                      |               |               |               | <0.001         |
| Mean (SD)                                      | 4.56 (1.26)   | 2.54 (1.34)   | 1.69 (0.57)   | Kruskal-Wallis |
| Median (IQR)                                   | 4.70 (1.67)   | 2.47 (1.66)   | 1.58 (0.45)   |                |
| Group                                          | a             | b             | c             |                |
| Potential yield or water-limited yield (Mg/ha) |               |               |               | <0.001         |
| Mean (SD)                                      | 8.70 (1.36)   | 7.61 (1.85)   | 6.78 (1.27)   | Kruskal-Wallis |
| Median (IQR)                                   | 8.80 (1.90)   | 7.90 (2.65)   | 7.10 (0.50)   |                |
| Group                                          | a             | b             | b             |                |
| Relative yield gap (%)                         |               |               |               | <0.001         |
| Mean (SD)                                      | 45.74 (17.90) | 66.35 (19.19) | 74.08 (12.58) | <0.001         |
| Median (IQR)                                   | 45.00 (25.65) | 69.25 (24.17) | 76.80 (17.20) | 1-way ANOVA    |
| Group                                          | b             | a             | a             |                |



**Table S5**

N, P, K application rates, partial factor productivity of N, P and K and grain yield, and relative yield gap in rice fields across various agroecological zones (AEZ) in sub-Saharan Africa.

|                              | Humid             | Sub-humid        | Semi-Arid          | Arid             | Highlands         | Test statistic |
|------------------------------|-------------------|------------------|--------------------|------------------|-------------------|----------------|
| N application rate (kg N/ha) |                   |                  |                    |                  |                   | <0.001         |
| Mean (SD)                    | 32.46 (38.36)     | 48.95 (43.18)    | 59.52 (45.49)      | 139.38 (51.73)   | 35.53 (47.24)     | Kruskal-Wallis |
| Median (IQR)                 | 14.35 (68.52)     | 38.10 (73.15)    | 63.45 (71.00)      | 136.00 (46.00)   | 24.65 (45.20)     |                |
| Group                        | b                 | b                | b                  | a                | b                 |                |
| P application rate (kg P/ha) |                   |                  |                    |                  |                   | 0.005          |
| Mean (SD)                    | 5.82 (6.42)       | 9.15 (9.73)      | 9.72 (7.59)        | 18.06 (10.23)    | 6.95 (10.01)      | Kruskal-Wallis |
| Median (IQR)                 | 2.50 (10.43)      | 6.00 (12.90)     | 9.45 (15.02)       | 18.50 (8.15)     | 2.40 (8.33)       |                |
| Group                        | b                 | b                | ab                 | a                | b                 |                |
| K application rate (kg K/ha) |                   |                  |                    |                  |                   | 0.025          |
| Mean (SD)                    | 10.98 (12.17)     | 12.29 (13.42)    | 9.46 (9.97)        | 1.21 (2.12)      | 4.70 (7.43)       | Kruskal-Wallis |
| Median (IQR)                 | 4.25 (20.30)      | 6.00 (21.90)     | 5.30 (13.60)       | 0.00 (1.75)      | 0.00 (7.60)       |                |
| Group                        | ab                | a                | ab                 | b                | ab                |                |
| PFPN (kg grain/kg N)         |                   |                  |                    |                  |                   | 0.002          |
| Mean (SD)                    | 327.27 (516.74)   | 167.27 (369.99)  | 134.00 (330.23)    | 42.69 (19.93)    | 327.00 (459.51)   | Kruskal-Wallis |
| Median (IQR)                 | 86.00 (256.00)    | 61.00 (104.00)   | 49.00 (30.25)      | 39.00 (10.00)    | 108.00 (144.00)   |                |
| Group                        | ab                | ab               | bc                 | c                | a                 |                |
| PFPP (kg grain/kg P)         |                   |                  |                    |                  |                   | 0.626          |
| Mean (SD)                    | 1216.00 (2214.66) | 744.13 (1474.51) | 2379.78 (13565.04) | 472.27 (550.14)  | 1177.83 (1488.36) | Kruskal-Wallis |
| Median (IQR)                 | 444.00 (575.00)   | 302.00 (401.25)  | 284.00 (200.00)    | 299.00 (150.50)  | 717.00 (856.50)   |                |
| Group                        | a                 | a                | a                  | a                | a                 |                |
| PFPK (kg grain/kg K)         |                   |                  |                    |                  |                   | 0.131          |
| Mean (SD)                    | 510.44 (740.91)   | 460.05 (934.67)  | 833.44 (2973.96)   | 1191.50 (125.16) | 745.75 (645.99)   | Kruskal-Wallis |
| Median (IQR)                 | 234.00 (295.00)   | 178.00 (317.25)  | 222.00 (171.00)    | 1191.50 (88.50)  | 578.00 (407.25)   |                |
| Group                        | a                 | a                | a                  | a                | a                 |                |

|                                                |               |               |               |               |               |                |
|------------------------------------------------|---------------|---------------|---------------|---------------|---------------|----------------|
| Grain yield (Mg grain/ha)                      |               |               |               |               |               | <0.001         |
| Mean (SD)                                      | 2.51 (1.23)   | 3.10 (1.58)   | 3.12 (1.86)   | 5.30 (1.02)   | 3.88 (1.28)   | Kruskal-Wallis |
| Median (IQR)                                   | 2.44 (2.11)   | 2.70 (2.24)   | 2.76 (3.51)   | 5.56 (1.10)   | 3.91 (1.56)   |                |
| Group                                          | b             | b             | b             | a             | ab            |                |
| Potential yield or water-limited yield (Mg/ha) |               |               |               |               |               | <0.001         |
| Mean (SD)                                      | 9.39 (1.61)   | 7.33 (1.74)   | 8.35 (1.11)   | 7.23 (0.51)   | 10.32 (2.00)  | Kruskal-Wallis |
| Median (IQR)                                   | 9.40 (1.08)   | 7.10 (2.75)   | 8.60 (1.15)   | 7.40 (0.00)   | 9.40 (1.10)   |                |
| Group                                          | a             | c             | ab            | bc            | a             |                |
| Relative yield gap (%)                         |               |               |               |               |               | <0.001         |
| Mean (SD)                                      | 73.63 (12.32) | 60.96 (20.30) | 53.62 (17.74) | 27.18 (11.91) | 57.66 (13.86) | <0.001         |
| Median (IQR)                                   | 76.50 (19.60) | 65.80 (26.85) | 48.20 (25.05) | 25.80 (16.50) | 63.30 (16.30) | 1-way ANOVA    |
| Group                                          | a             | ab            | b             | c             | ab            |                |

**Table S6**

Proportion (%) of studies having optimum levels of partial factor productivity of N (PFPN), P (PFPP), and K (PFPK) across various regions [West Africa (WA), Central Africa (CA), and East and Southern Africa (ESA)] in sub-Saharan Africa

| Indicators threshold levels                                           | WA   | CA   | ESA  | Overall |
|-----------------------------------------------------------------------|------|------|------|---------|
| Partial factor productivity of N (PFPN) (kg grain kg <sup>-1</sup> N) |      |      |      |         |
| Very low (wasteful application)                                       | 17.9 | 0.0  | 4.8  | 14.7    |
| Optimum range                                                         | 52.6 | 33.3 | 33.3 | 48.0    |
| Very high (risk of soil mining)                                       | 28.8 | 66.7 | 61.9 | 36.8    |
| Partial factor productivity of P (PFPP) (kg grain kg <sup>-1</sup> P) |      |      |      |         |
| Very low (wasteful application)                                       | 5.7  | 0.0  | 0.0  | 4.5     |
| Optimum range                                                         | 44.7 | 20.0 | 28.1 | 41.0    |
| Very high (risk of soil mining)                                       | 49.6 | 80.0 | 71.9 | 54.5    |
| Partial factor productivity of K (PFPK) (kg grain kg <sup>-1</sup> K) |      |      |      |         |
| Very low (wasteful application)                                       | 1.9  | 0.0  | 0.0  | 1.6     |
| Optimum range                                                         | 60.7 | 20.0 | 9.1  | 54.5    |
| Very high (risk of soil mining)                                       | 37.4 | 80.0 | 90.9 | 43.9    |

For PFPN, Very low (wasteful application, < 30); Optimum range (30 - 100); Very high (risk of soil mining, > 100)

For PFPP, Very low (wasteful application, < 100); Optimum range (100 - 300); Very high (risk of soil mining, > 300)

For PFPK, Very low (wasteful application, < 50); Optimum range (50 - 300); Very high (risk of soil mining, > 300)

**Table S7**

Proportion (%) of studies having optimum levels of partial factor productivity of N (PFPN), P (PFPP), and K (PFPK) across various growing environments [irrigated lowland (IL), rainfed lowland (RL) and, rainfed upland (RU)] in sub-Saharan Africa

| Indicators threshold levels                                           | IL   | RL   | RU   | Overall |
|-----------------------------------------------------------------------|------|------|------|---------|
| Partial factor productivity of N (PFPN) (kg grain kg <sup>-1</sup> N) |      |      |      |         |
| Very low (wasteful application)                                       | 4.9  | 15.6 | 22.2 | 14.7    |
| Optimum range                                                         | 74.1 | 42.2 | 27.8 | 48.0    |
| Very high (risk of soil mining)                                       | 21.0 | 40.0 | 50.0 | 36.8    |
| Partial factor productivity of P (PFPP) (kg grain kg <sup>-1</sup> P) |      |      |      |         |
| Very low (wasteful application)                                       | 0.0  | 0.0  | 7.1  | 4.5     |
| Optimum range                                                         | 50.0 | 43.2 | 50.0 | 41.0    |
| Very high (risk of soil mining)                                       | 50.0 | 56.8 | 42.9 | 54.5    |
| Partial factor productivity of K (PFPK) (kg grain kg <sup>-1</sup> K) |      |      |      |         |
| Very low (wasteful application)                                       | 0.0  | 0.0  | 12.5 | 1.6     |
| Optimum range                                                         | 66.7 | 48.0 | 50.0 | 54.5    |
| Very high (risk of soil mining)                                       | 33.3 | 52.0 | 37.5 | 43.9    |

For PFPN, Very low (wasteful application, < 30); Optimum range (30 - 100); Very high (risk of soil mining, > 100)

For PFPP, Very low (wasteful application, < 100); Optimum range (100 - 300); Very high (risk of soil mining, > 300)

For PFPK, Very low (wasteful application, < 50); Optimum range (50 - 300); Very high (risk of soil mining, > 300)

**Table S8**

Proportion (%) of data points having optimum levels of partial factor productivity of N (PFPN), P (PFPP), and K (PFPK) across various agroecological zones (AEZ) in sub-Saharan Africa

| Indicators threshold levels                                           | Humid | Sub-Humid | Semi-Arid | Arid  | Highlands | Overall |
|-----------------------------------------------------------------------|-------|-----------|-----------|-------|-----------|---------|
| Partial factor productivity of N (PFPN) (kg grain kg <sup>-1</sup> N) |       |           |           |       |           |         |
| Very low (wasteful application)                                       | 9.1   | 13.4      | 12.5      | 15.4  | 0.0       | 14.7    |
| Optimum range                                                         | 54.5  | 52.2      | 70.8      | 76.9  | 33.3      | 48.0    |
| Very high (risk of soil mining)                                       | 36.4  | 32.8      | 16.7      | 7.7   | 66.7      | 36.8    |
| Partial factor productivity of P (PFPP) (kg grain kg <sup>-1</sup> P) |       |           |           |       |           |         |
| Very low (wasteful application)                                       | 0.0   | 0.0       | 4.4       | 0.0   | 0.0       | 4.5     |
| Optimum range                                                         | 33.3  | 50.0      | 48.9      | 54.5  | 33.3      | 41.0    |
| Very high (risk of soil mining)                                       | 66.7  | 50.0      | 46.7      | 45.5  | 66.7      | 54.5    |
| Partial factor productivity of K (PFPK) (kg grain kg <sup>-1</sup> K) |       |           |           |       |           |         |
| Very low (wasteful application)                                       | 0.0   | 0.0       | 2.9       | 0.0   | 0.0       | 1.6     |
| Optimum range                                                         | 55.6  | 64.3      | 70.6      | 0.0   | 25.0      | 54.5    |
| Very high (risk of soil mining)                                       | 44.4  | 35.7      | 26.5      | 100.0 | 75.0      | 43.9    |

For PFPN, Very low (wasteful application, < 30); Optimum range (30 - 100); Very high (risk of soil mining, > 100)

For PFPP, Very low (wasteful application, < 100); Optimum range (100 - 300); Very high (risk of soil mining, > 300)

For PFK, Very low (wasteful application, < 50); Optimum range (50 - 300); Very high (risk of soil mining, > 300)

**Table S9**

Average values of fertilizer inputs and grain yield across groups identified by cluster analysis

|                                     | HYHN        | LYLN        | LYMN        | MYHN        | MYLN        | VHYVHN      |
|-------------------------------------|-------------|-------------|-------------|-------------|-------------|-------------|
| <b>N application rate (kg N/ha)</b> |             |             |             |             |             |             |
| Count                               | 45          | 71          | 31          | 28          | 41          | 8           |
| Mean (SD)                           | 93 (27)     | 10 (8)      | 63 (17)     | 87 (32)     | 9 (9)       | 171 (46)    |
| Median (IQR)                        | 96 (36)     | 8 (12)      | 63 (28)     | 78 (24)     | 6 (14)      | 164 (17)    |
| <b>P application rate (kg P/ha)</b> |             |             |             |             |             |             |
| Mean (SD)                           | 18 (8)      | 2 (1)       | 13 (7)      | 13 (6)      | 2 (3)       | 23 (12)     |
| Median (IQR)                        | 18 (6)      | 1 (2)       | 10 (6)      | 12 (6)      | 1 (2)       | 22 (10)     |
| <b>K application rate (kg K/ha)</b> |             |             |             |             |             |             |
| Mean (SD)                           | 18 (15)     | 2 (3)       | 16 (9)      | 19 (11)     | 3 (5)       | 13 (20)     |
| Median (IQR)                        | 18 (27)     | 1 (4)       | 18 (4)      | 21 (15)     | 0 (4)       | 5 (18)      |
| <b>Grain yield (Mg grain/ha)</b>    |             |             |             |             |             |             |
| Mean (SD)                           | 5.16 (0.58) | 1.44 (0.51) | 1.76 (0.50) | 3.33 (0.63) | 3.20 (0.69) | 6.69 (1.06) |
| Median (IQR)                        | 5.13 (0.76) | 1.48 (0.81) | 1.55 (0.64) | 3.44 (1.03) | 3.12 (1.03) | 6.40 (0.64) |
| <b>PFPN (kg grain/kg N)</b>         |             |             |             |             |             |             |
| Mean (SD)                           | 62 (25)     | 275 (379)   | 32 (19)     | 43 (17)     | 544 (585)   | 42 (16)     |
| Median (IQR)                        | 53 (26)     | 150 (241)   | 23 (18)     | 40 (26)     | 294 (587)   | 38 (8)      |

Cluster 1: High Yield and High N application rate (HYHN); Cluster 2: Low Yield and Low N application rate (LYLN);

Cluster 3: Low Yield and Medium N application rate (LYMN); Cluster 4: Medium Yield and High N application rate (MYHN);

Cluster 5: Medium Yield and Low N application rate (MYLN); Cluster 6: Very High Yield and Very High N application rate (VHYVHN)

**Table S10:**

Proportions of yield and N input clusters for different regions, rice-growing environments, and countries

|                            | HYHN           | LYLN           | LYMN           | MYHN           | MYLN           | VHYVHN        |
|----------------------------|----------------|----------------|----------------|----------------|----------------|---------------|
| <b>Region</b>              |                |                |                |                |                |               |
| Count (%)                  | 45 (20%)       | 71 (32%)       | 31 (14%)       | 28 (12%)       | 41 (18%)       | 8 (4%)        |
| (Row %)(Col %)             |                |                |                |                |                |               |
| WA                         | 37 (23%) (82%) | 47 (29%) (66%) | 29 (18%) (94%) | 21 (13%) (75%) | 23 (14%) (56%) | 6 (4%) (75%)  |
| CA                         | 1 (11%) (2%)   | 2 (22%) (3%)   | 0 (0%) (0%)    | 1 (11%) (4%)   | 4 (44%) (10%)  | 1 (11%) (12%) |
| ESA                        | 7 (13%) (16%)  | 22 (42%) (31%) | 2 (4%) (6%)    | 6 (12%) (21%)  | 14 (27%) (34%) | 1 (2%) (12%)  |
| <b>Growing environment</b> |                |                |                |                |                |               |
| IL                         | 42 (51%) (98%) | 2 (2%) (6%)    | 2 (2%) (12%)   | 16 (20%) (64%) | 14 (17%) (44%) | 6 (7%) (75%)  |
| RL                         | 1 (2%) (2%)    | 18 (34%) (55%) | 10 (19%) (59%) | 8 (15%) (32%)  | 14 (26%) (44%) | 2 (4%) (25%)  |
| RU                         | 0 (0%) (0%)    | 13 (57%) (39%) | 5 (22%) (29%)  | 1 (4%) (4%)    | 4 (17%) (12%)  | 0 (0%) (0%)   |
| <b>Country</b>             |                |                |                |                |                |               |
| Benin                      | 7 (50%) (16%)  | 2 (14%) (3%)   | 3 (21%) (10%)  | 2 (14%) (7%)   | 0 (0%) (0%)    | 0 (0%) (0%)   |
| Burkina Faso               | 7 (18%) (16%)  | 17 (45%) (24%) | 10 (26%) (32%) | 2 (5%) (7%)    | 2 (5%) (5%)    | 0 (0%) (0%)   |
| Cameroon                   | 1 (14%) (2%)   | 1 (14%) (1%)   | 0 (0%) (0%)    | 1 (14%) (4%)   | 3 (43%) (7%)   | 1 (14%) (12%) |
| Chad                       | 0 (0%) (0%)    | 0 (0%) (0%)    | 0 (0%) (0%)    | 0 (0%) (0%)    | 1 (100%) (2%)  | 0 (0%) (0%)   |
| Côte d'Ivoire              | 4 (20%) (9%)   | 4 (20%) (6%)   | 1 (5%) (3%)    | 2 (10%) (7%)   | 9 (45%) (22%)  | 0 (0%) (0%)   |
| DRC                        | 0 (0%) (0%)    | 1 (100%) (1%)  | 0 (0%) (0%)    | 0 (0%) (0%)    | 0 (0%) (0%)    | 0 (0%) (0%)   |
| Ethiopia                   | 0 (0%) (0%)    | 0 (0%) (0%)    | 0 (0%) (0%)    | 0 (0%) (0%)    | 2 (100%) (5%)  | 0 (0%) (0%)   |
| Ghana                      | 3 (15%) (7%)   | 5 (25%) (7%)   | 4 (20%) (13%)  | 5 (25%) (18%)  | 2 (10%) (5%)   | 1 (5%) (12%)  |
| Guinea                     | 0 (0%) (0%)    | 2 (50%) (3%)   | 1 (25%) (3%)   | 0 (0%) (0%)    | 1 (25%) (2%)   | 0 (0%) (0%)   |
| Kenya                      | 4 (80%) (9%)   | 0 (0%) (0%)    | 0 (0%) (0%)    | 1 (20%) (4%)   | 0 (0%) (0%)    | 0 (0%) (0%)   |
| Madagascar                 | 1 (11%) (2%)   | 3 (33%) (4%)   | 0 (0%) (0%)    | 0 (0%) (0%)    | 4 (44%) (10%)  | 1 (11%) (12%) |
| Malawi                     | 0 (0%) (0%)    | 3 (75%) (4%)   | 1 (25%) (3%)   | 0 (0%) (0%)    | 0 (0%) (0%)    | 0 (0%) (0%)   |
| Mali                       | 5 (42%) (11%)  | 1 (8%) (1%)    | 4 (33%) (13%)  | 1 (8%) (4%)    | 1 (8%) (2%)    | 0 (0%) (0%)   |
| Mozambique                 | 0 (0%) (0%)    | 4 (100%) (6%)  | 0 (0%) (0%)    | 0 (0%) (0%)    | 0 (0%) (0%)    | 0 (0%) (0%)   |
| Niger                      | 2 (40%) (4%)   | 0 (0%) (0%)    | 0 (0%) (0%)    | 2 (40%) (7%)   | 0 (0%) (0%)    | 1 (20%) (12%) |
| Nigeria                    | 1 (5%) (2%)    | 11 (52%) (15%) | 3 (14%) (10%)  | 3 (14%) (11%)  | 3 (14%) (7%)   | 0 (0%) (0%)   |
| Rwanda                     | 0 (0%) (0%)    | 0 (0%) (0%)    | 0 (0%) (0%)    | 1 (100%) (4%)  | 0 (0%) (0%)    | 0 (0%) (0%)   |
| Senegal                    | 8 (57%) (18%)  | 0 (0%) (0%)    | 0 (0%) (0%)    | 2 (14%) (7%)   | 0 (0%) (0%)    | 4 (29%) (50%) |
| Sierra Leone               | 0 (0%) (0%)    | 3 (75%) (4%)   | 0 (0%) (0%)    | 0 (0%) (0%)    | 1 (25%) (2%)   | 0 (0%) (0%)   |
| Tanzania                   | 2 (12%) (4%)   | 5 (31%) (7%)   | 1 (6%) (3%)    | 4 (25%) (14%)  | 4 (25%) (10%)  | 0 (0%) (0%)   |
| The Gambia                 | 0 (0%) (0%)    | 2 (50%) (3%)   | 0 (0%) (0%)    | 1 (25%) (4%)   | 1 (25%) (2%)   | 0 (0%) (0%)   |
| Togo                       | 0 (0%) (0%)    | 0 (0%) (0%)    | 3 (43%) (10%)  | 1 (14%) (4%)   | 3 (43%) (7%)   | 0 (0%) (0%)   |
| Uganda                     | 0 (0%) (0%)    | 2 (33%) (3%)   | 0 (0%) (0%)    | 0 (0%) (0%)    | 4 (67%) (10%)  | 0 (0%) (0%)   |
| Zambia                     | 0 (0%) (0%)    | 5 (100%) (7%)  | 0 (0%) (0%)    | 0 (0%) (0%)    | 0 (0%) (0%)    | 0 (0%) (0%)   |

Cluster 1: High Yield and High N application rate (HYHN); Cluster 2: Low Yield and Low N application rate (LYLN);

Cluster 3: Low Yield and Medium N application rate (LYMN); Cluster 4: Medium Yield and High N application rate (MYHN);

Cluster 5: Medium Yield and Low N application rate (MYLN); Cluster 6: Very High Yield and Very High N application rate (VHYVHN)

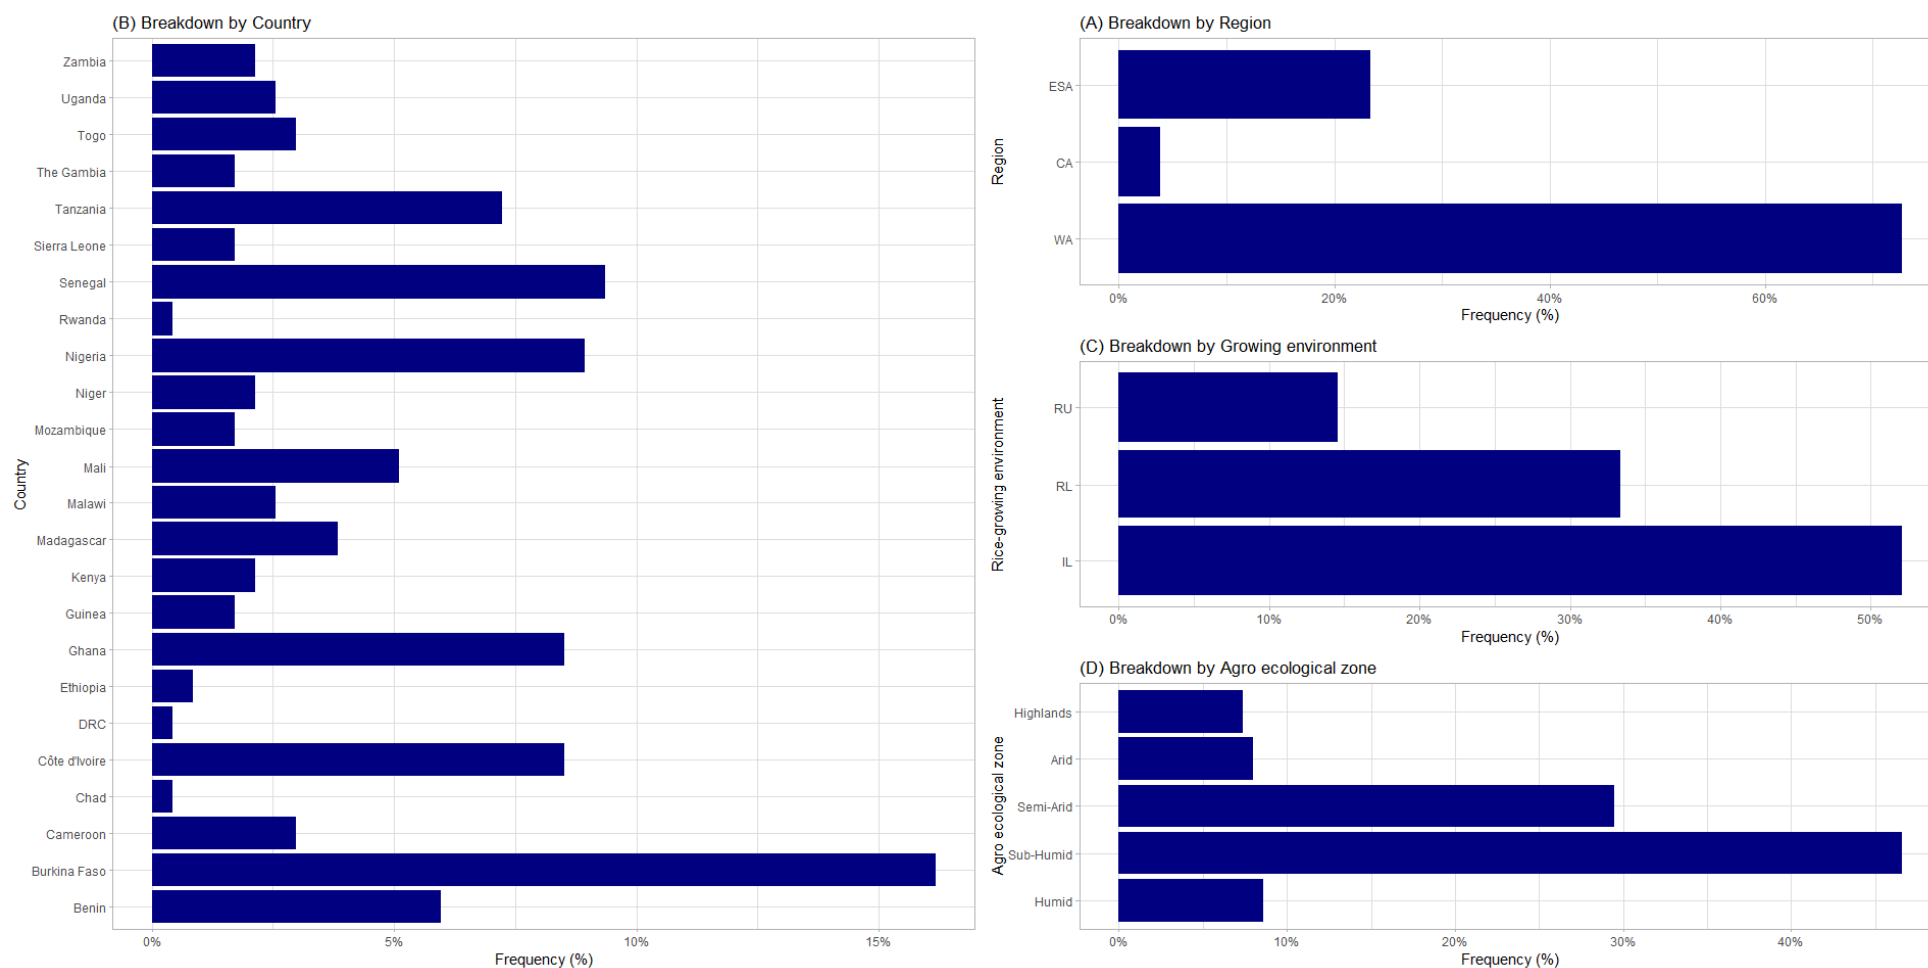

**Fig. S1.** Data points of fertilizer application rates breakdown by (A) Region; (B) Country; (C) Growing environment and (D) Agroecological zone in rice fields reviewed from studies conducted between 1995 and 2020 in sub-Saharan Africa.



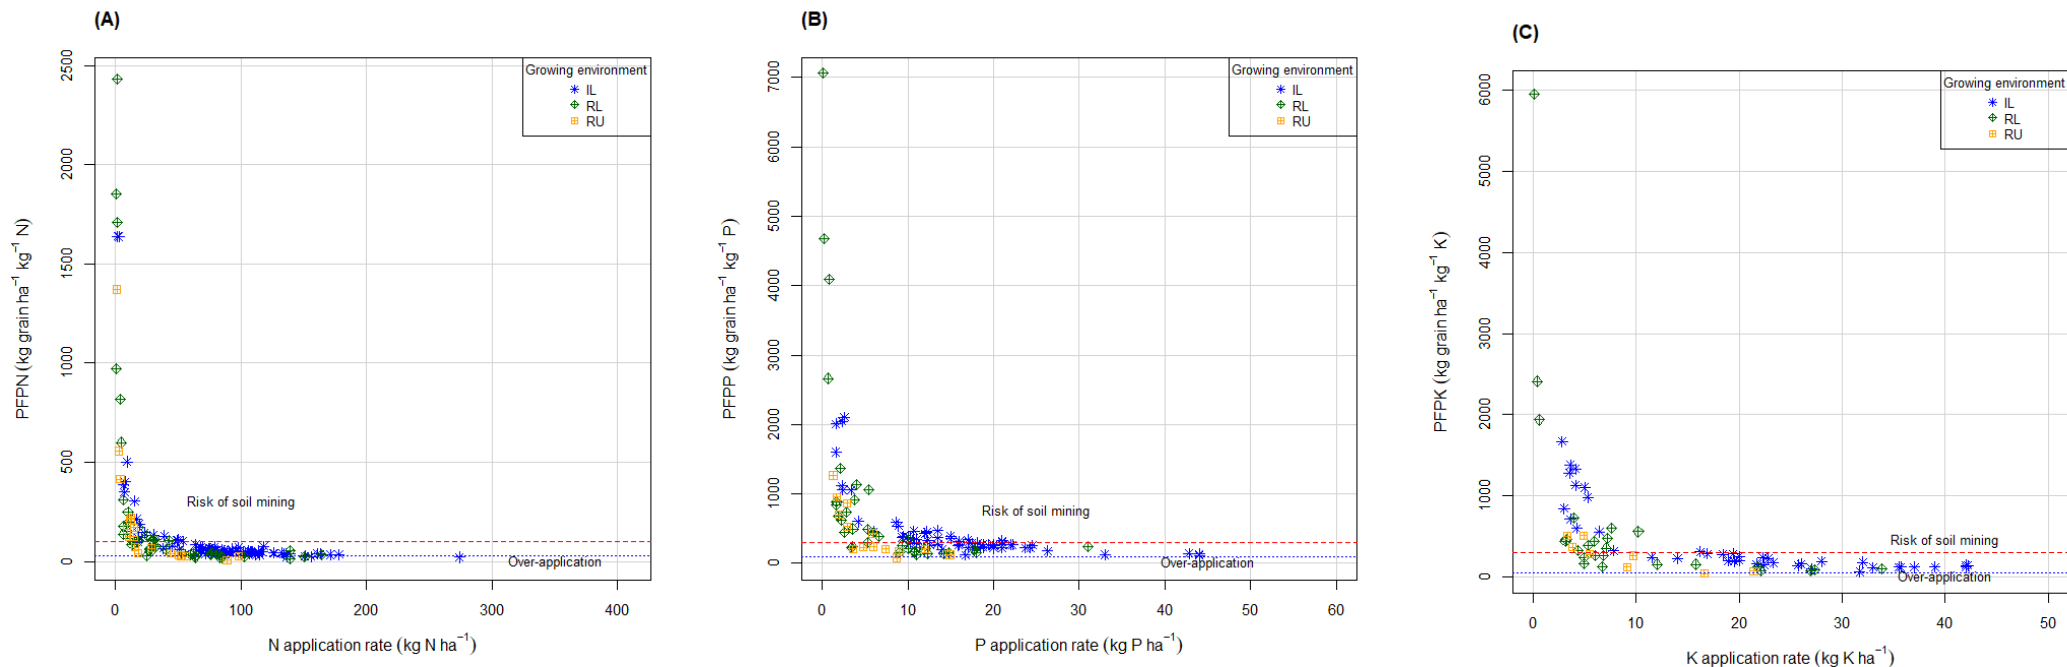

**Fig. S2.** Partial factor productivity (PFP) of (A) nitrogen (PFPN)- (B) phosphorus (PFPP)- and (C) potassium (PFPK) from data points in irrigated lowland (IL), rainfed lowland (RL) and, rainfed upland (RU) retrieved from surveys/studies conducted in sub-Saharan Africa between 1995 and 2020. The horizontal upper red dashed lines indicate the range of risk of soil mining for the corresponding nutrient. The horizontal lower blue dotted lines indicate the range of possible over-application for the corresponding nutrient.

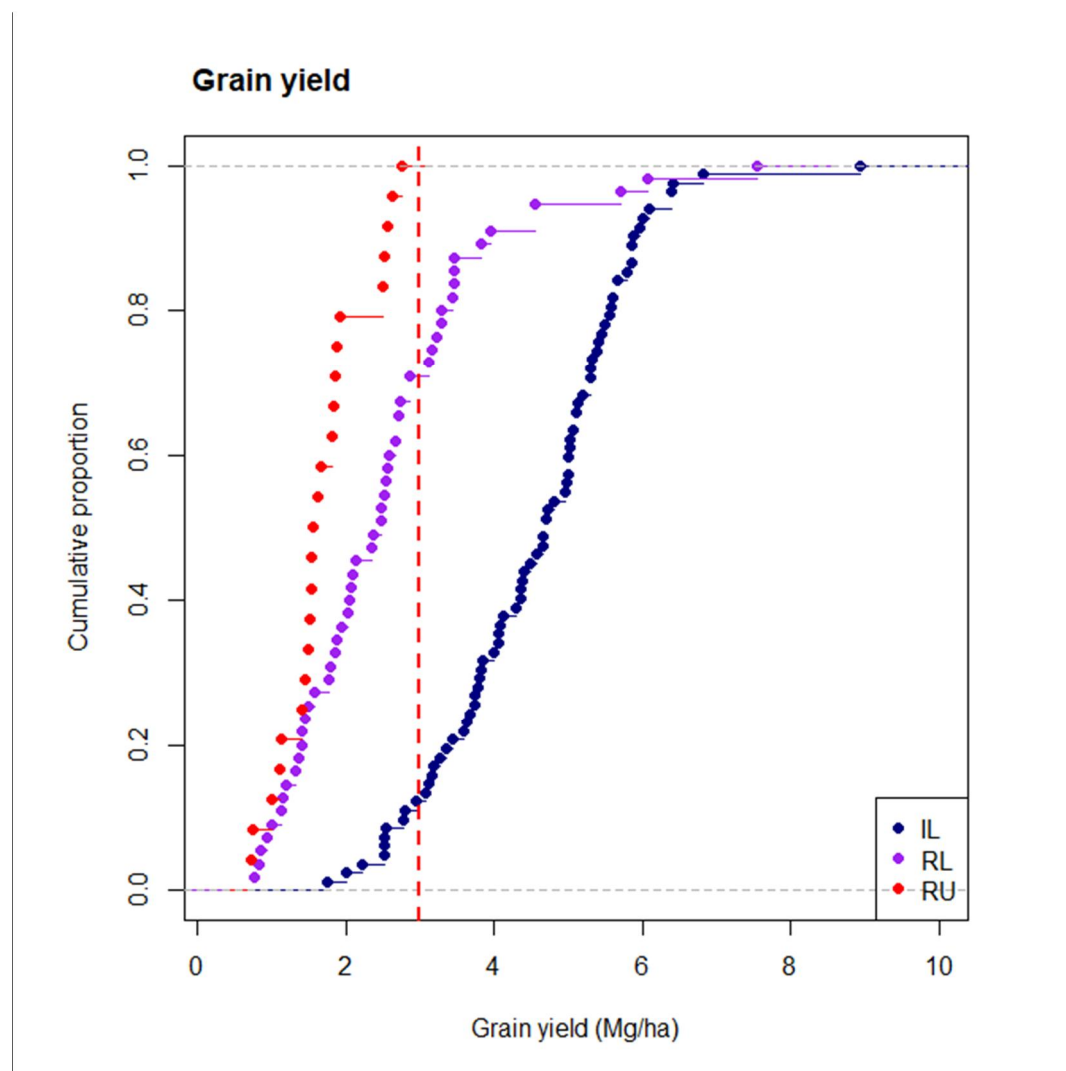

**Fig. S3.** Cumulative distribution probability of grain yield ( $\text{Mg ha}^{-1}$ ) from data points in irrigated lowland (IL), rainfed lowland (RL), and, rainfed upland (RU) retrieved from surveys/studies conducted in sub-Saharan Africa between 1995 and 2020. The dashed red line represents the global average yield ( $2.98 \text{ Mg ha}^{-1}$ ).

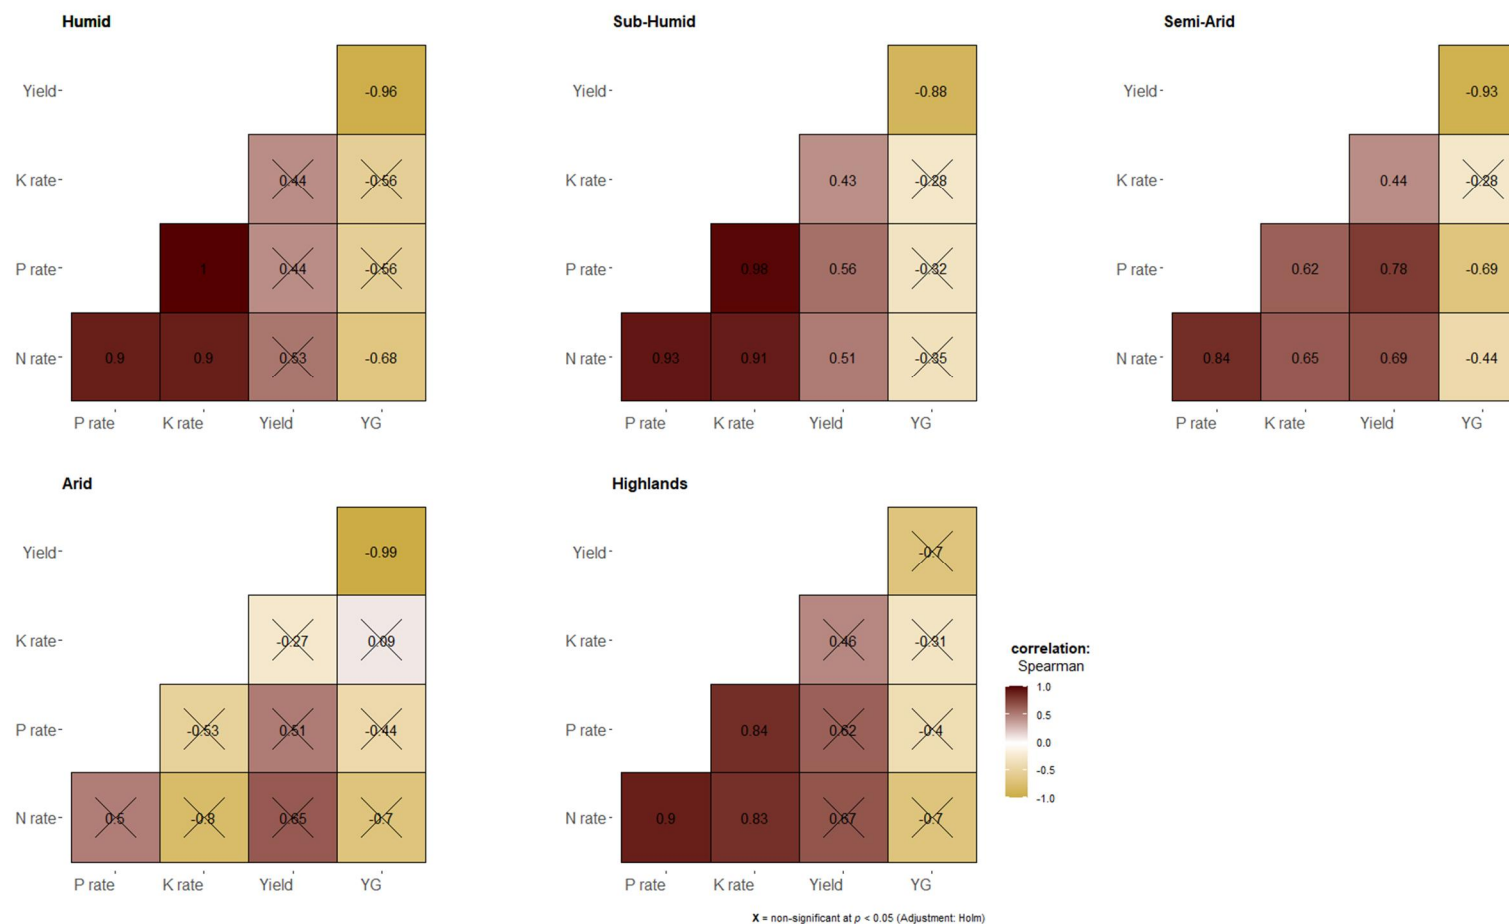

**Fig. S4.** Correlogram showing the relationships between nutrients (N, P, and K) application rates, rice grain yield, and relative yield gap in different studies across growing environments [irrigated lowland (IL), rainfed lowland (RL) and, rainfed upland (RU)] in sub-Saharan Africa. The values displayed in the matrix are Spearman's rank correlation coefficients ( $\rho$ ). Non-significant  $\rho$  ( $p < 0.05$ ) are marked with an X. Positive correlations are displayed in maroon (or dark red) and negative correlations in goldenrod. The color intensity (see color bar) of the square is proportional to the correlation coefficient.

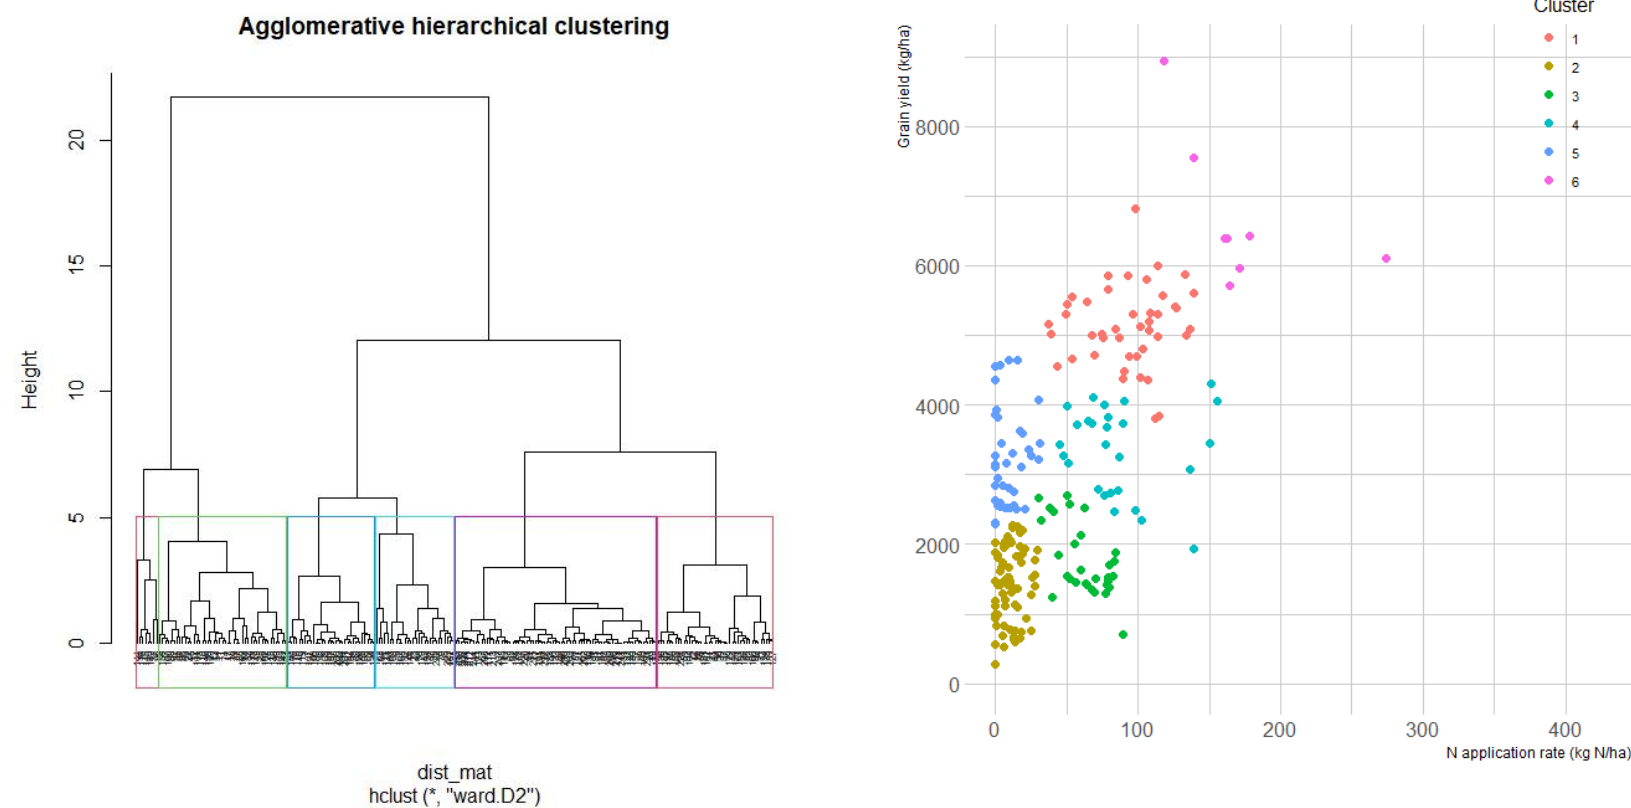

**Fig. S5.** Agglomerative hierarchical cluster analysis on 224 data points (from studies conducted between 1995 and 2020 in sub-Saharan Africa) using grain yield (kg/ha) and N application rate (kg N/ha). Colored boxes and points describe the 6 clusters or groups:

Cluster 1: High Yield and High N application rate (HYHN);

Cluster 2: Low Yield and Low N application rate (LYLN);

Cluster 3: Low Yield and Medium N application rate (LYMN);

<https://doi.org/10.1016/j.gfs.2023.100708>.

*Johnson et al. 2023*

Cluster 4: Medium Yield and High N application rate (MYHN);

Cluster 5: Medium Yield and Low N application rate (MYLN);

Cluster 6: Very High Yield and Very High N application rate (VHYVHN)

## References of the studies included the systematic literature review

(Africa Rice Center (AfricaRice) and Syngenta Foundation, 2016; Arouna et al., 2021; Becker et al., 2003; Dossou-Yovo et al., 2020; Dossou-Yovo and Saito, 2021; FAO, 2021; Ibrahim et al., 2022; IFA/IFDC/IPI/PPI/FAO, 2002; Kihoro et al., 2013; Komatsu et al., 2022; Ludemann et al., 2022; Ministère de l'Agriculture et des Aménagements Hydro-agricoles (MAAH), 2021; Muhunyu, 2012; Nakano et al., 2011; Ozaki and Sakurai, 2021; Saito et al., 2015; Senthilkumar et al., 2020; Tanaka et al., 2015, 2013; Tsujimoto et al., 2019, 2014; Wopereis et al., 1999; World Bank, 2021)

1. Africa Rice Center (AfricaRice), Syngenta Foundation, 2016. Report on Calibrating and Validating an ICT-based Decision Support System for Nutrient Management for Rice in West Africa. Africa Rice Center, Cotonou, Benin.
2. Arouna, A., Devkota, K.P., Yergo, W.G., Saito, K., Frimpong, B.N., Adegbola, P.Y., Depieu, M.E., Kenyi, D.M., Ibro, G., Fall, A.A., Usman, S., 2021. Assessing rice production sustainability performance indicators and their gaps in twelve sub-Saharan African countries. *Field Crops Research* 271, 108263. <https://doi.org/10.1016/j.fcr.2021.108263>
3. Becker, M., Johnson, D.E., Wopereis, M.C.S., Sow, A., 2003. Rice yield gaps in irrigated systems along an agro-ecological gradient in West Africa. *J. Plant Nutr. Soil Sci.* 166, 61–67. <https://doi.org/10.1002/jpln.200390013>
4. Dossou-Yovo, E.R., Saito, K., 2021. Impact of management practices on weed infestation, water productivity, rice yield and grain quality in irrigated systems in Côte d'Ivoire. *Field Crops Research* 270, 108209. <https://doi.org/10.1016/j.fcr.2021.108209>
5. Dossou-Yovo, E.R., Vandamme, E., Dieng, I., Johnson, J.-M., Saito, K., 2020. Decomposing rice yield gaps into efficiency, resource and technology yield gaps in sub-Saharan Africa. *Field Crops Research* 258, 107963. <https://doi.org/10.1016/j.fcr.2020.107963>
6. FAO, 2021. FAOSTAT statistical database. <http://www.fao.org/faostat/en/#data/QCL> (accessed 9.21.21).
7. Ibrahim, A., Saito, K., Kokou, A., Johnson, J.-M., Diagne, M., Fagnombo, D.J., Felix, F., Sylvia, B.O., Martial, H., 2022. Seizing opportunity towards sustainable rice cultivation in sub-Saharan Africa. *Environmental and Sustainability Indicators* 15, 100189. <https://doi.org/10.1016/j.indic.2022.100189>
8. IFA/IFDC/IPI/PPI/FAO, 2002. Fertilizer use by crop. Rome, Italy.
9. Kihoro, J., Bosco, N.J., Murage, H., Ateka, E., Makihara, D., 2013. Investigating the impact of rice blast disease on the livelihood of the local farmers in greater Mwea region of Kenya. *SpringerPlus* 2, 308. <https://doi.org/10.1186/2193-1801-2-308>
10. Komatsu, S., Saito, K., Sakurai, T., 2022. Changes in production, yields, and the cropped area of lowland rice over the last 20 years and factors affecting their variations in Côte d'Ivoire. *Field Crops Research* 277, 108424. <https://doi.org/10.1016/j.fcr.2021.108424>
11. Ludemann, C.I., Gruere, A., Heffer, P., Dobermann, A., 2022. Global data on fertilizer use by crop and by country. *Sci Data* 9, 501. <https://doi.org/10.1038/s41597-022-01592-z>

12. Ministère de l'Agriculture et des Aménagements Hydro-agricoles (MAAH), 2021. Tableau de bord statistique de l'Agriculture 2020. Ministère de l'Agriculture et des Aménagements Hydro-agricoles (MAAH), Ouagadougou, Burkina Faso.
13. Muhunyu, J.G., 2012. Is doubling rice production in Kenya by 2018 achievable? *Journal of Developments in Sustainable Agriculture* 7, 46–54. <https://doi.org/10.11178/jdsa.7.46>
14. Nakano, Y., Bamba, B., Diagne, A., Otsuka, K., Kajisa, K., 2011. The Possibility of a Rice Green Revolution in Large-scale Irrigation Schemes in Sub-Saharan Africa, Policy Research Working Papers. The World Bank. <https://doi.org/10.1596/1813-9450-5560>
15. Ozaki, R., Sakurai, T., 2021. Profitability of chemical fertilizer application : Comparison of lowland and upland rice cultivation in Madagascar. *JJAE* 23, 119–124. [https://doi.org/10.18480/jjae.23.0\\_119](https://doi.org/10.18480/jjae.23.0_119)
16. Saito, K., Diack, S., Dieng, I., N'Diaye, M.K., 2015. On-farm testing of a nutrient management decision-support tool for rice in the Senegal River valley. *Computers and Electronics in Agriculture* 116, 36–44. <https://doi.org/10.1016/j.compag.2015.06.008>
17. Senthilkumar, K., Rodenburg, J., Dieng, I., Vandamme, E., Sillo, F.S., Johnson, J. -M., Rajaona, A., Ramarolahy, J.A., Gasore, R., Abera, B.B., Kajiru, G.J., Mghase, J., Lamo, J., Rabeson, R., Saito, K., 2020. Quantifying rice yield gaps and their causes in Eastern and Southern Africa. *J Agro Crop Sci* 206, 478–490. <https://doi.org/10.1111/jac.12417>
18. Tanaka, A., Diagne, M., Saito, K., 2015. Causes of yield stagnation in irrigated lowland rice systems in the Senegal River Valley: Application of dichotomous decision tree analysis. *Field Crops Research* 176, 99–107. <https://doi.org/10.1016/j.fcr.2015.02.020>
19. Tanaka, A., Saito, K., Azoma, K., Kobayashi, K., 2013. Factors affecting variation in farm yields of irrigated lowland rice in southern-central Benin. *European Journal of Agronomy* 44, 46–53. <https://doi.org/10.1016/j.eja.2012.08.002>
20. Tsujimoto, Y., Muranaka, S., Saito, K., Asai, H., 2014. Limited Si-nutrient status of rice plants in relation to plant-available Si of soils, nitrogen fertilizer application, and rice-growing environments across Sub-Saharan Africa. *Field Crops Research* 155, 1–9. <https://doi.org/10.1016/j.fcr.2013.10.003>
21. Tsujimoto, Y., Rakotoson, T., Tanaka, A., Saito, K., 2019. Challenges and opportunities for improving N use efficiency for rice production in sub-Saharan Africa. *Plant Production Science* 1–15. <https://doi.org/10.1080/1343943X.2019.1617638>
22. Wopereis, M.C.S., Donovan, C., Nebie, B., Guindo, D., N'Diaye, M.K., 1999. Soil fertility management in irrigated rice systems in the Sahel and Savanna regions of West Africa Part I. Agronomic analysis. *Field Crops Research* 61, 125–145. [https://doi.org/10.1016/S0378-4290\(98\)00154-3](https://doi.org/10.1016/S0378-4290(98)00154-3)
23. World Bank, 2021. Microdata Library: Living Standards Measurements Study. <https://microdata.worldbank.org/index.php/catalog/lsms> (accessed 1.10.21).
